# Supplementary material for: N,N-Diarylamino end-capping as a new strategy for simultaneously enhancing open-circuit voltage, short-circuit current density and fill factor in small molecule organic solar cells
Source: Royal Society of Chemistry journal article supplement (doi:10.1039/c5ra00770d), 2015-01-01
Supplement: c5ra00770d1.pdf [file c5ra00770d1.pdf]

## Electronic supplementary information

### ***N,N*-Diarylamino End-capping Towards a New Strategy for Simultaneously Enhancement Open-Circuit Voltage, Short-Circuit Current Density and Fill Factor in Small Molecule Organic Solar Cells**

Daobin Yang, ‡<sup>a</sup> Youqin Zhu, ‡<sup>b</sup> Yan Jiao, <sup>a</sup> Lin Yang, <sup>a</sup> Qianqian Yang, <sup>b</sup> Qian Luo, <sup>a</sup> Xuemei Pu, <sup>a</sup> Yan Huang, <sup>\*a</sup> Suling Zhao, <sup>\*b</sup> and Zhiyun Lu <sup>\*a</sup>

<sup>a</sup> *Key Laboratory of Green Chemistry and Technology (Ministry of Education), College of Chemistry, Sichuan University, Chengdu 610064, P. R. China. E-mail: huangyan@scu.edu.cn; luzhiyun@scu.edu.cn*

<sup>b</sup> *Key Laboratory of Luminescence and Optical Information (Ministry of Education), Institute of Optoelectronics Technology, Beijing Jiaotong University, Beijing 100044, P. R. China. E-mail: slzhao@bjtu.edu.cn*

‡ The first two authors contributed equally to this work.

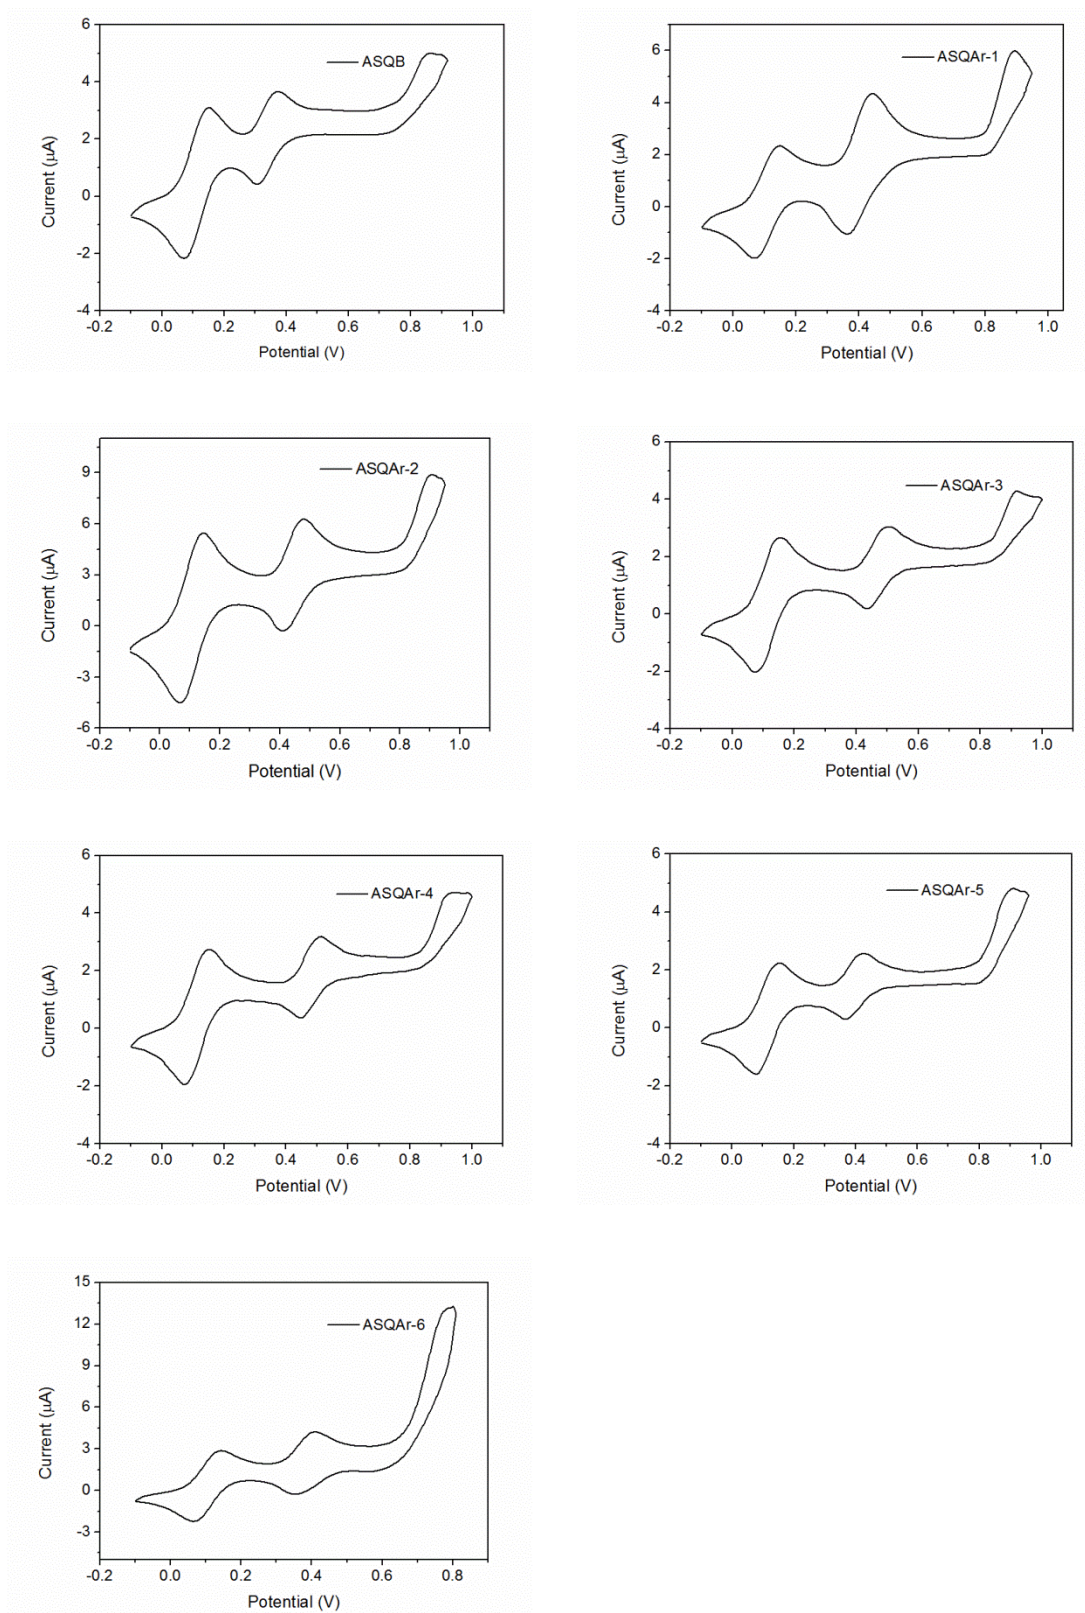

**Fig. S1** Cyclic voltammogram of the squaraine derivatives in dichloromethane solution.

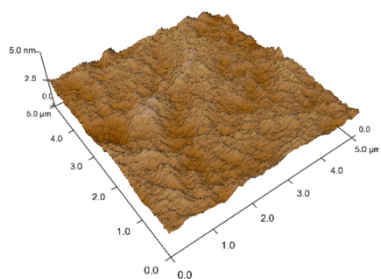

ASQB (RMS=0.24 nm)

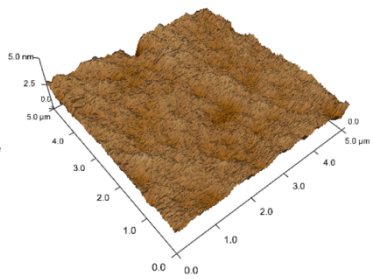

ASQAr-1 (RMS=0.23 nm)

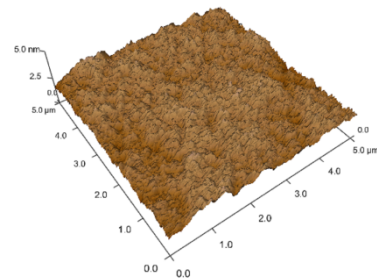

ASQAr-2 (RMS=0.25 nm)

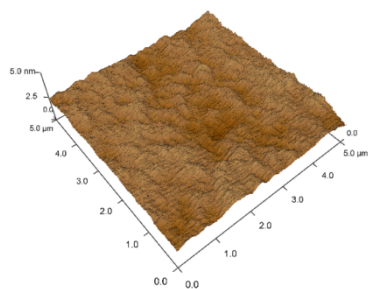

ASQAr-3 (RMS=0.21 nm)

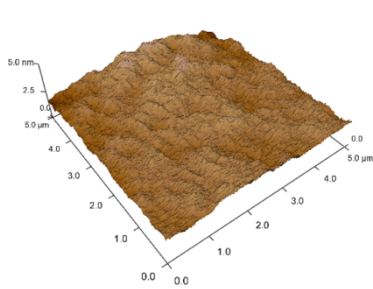

ASQAr-4 (RMS=0.29 nm)

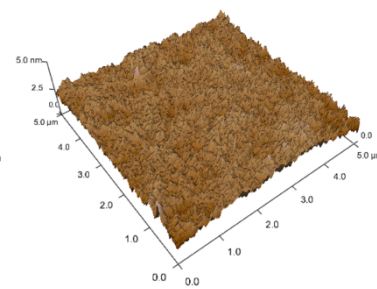

ASQAr-5 (RMS=0.25 nm)

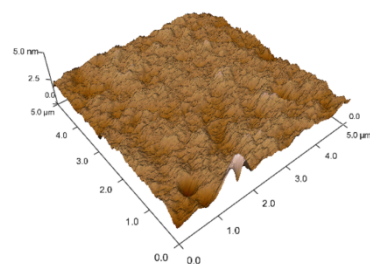

ASQAr-6 (RMS=0.26 nm)

**Fig. S2** 3D image obtained by tapping-mode AFM showing the morphology of squaraine derivatives: PC<sub>71</sub>BM (1: 5) blend films (size 5×5 μm).
